# Supplementary material for: The Effects of Transition from Bedtime to Morning Glargine Administration in Patients with Poorly Regulated Type 1 Diabetes Mellitus: Croatian Pilot Study
Source: PubMed Central journal article supplement — Diabetes Ther. 2015 Sep 14;6(4):643–8. doi: 10.1007/s13300-015-0130-2 (PMC4674472; doi:10.1007/s13300-015-0130-2), 2015-09-14
Supplement: 13300_2015_130_MOESM1_ESM.pdf [file 13300_2015_130_MOESM1_ESM.pdf]

- The average individual with type 1 diabetes mellitus (T1DM) experiences about two episodes of symptomatic hypoglycemia per week. This risk is increased markedly with the strict glycemic control and leads to impaired quality of life.
- The study hypothesized that T1DM patients with poor glycaemic control and frequent nocturnal and morning hypoglycemia would benefit from a transition of bedtime to morning administration of insulin glargine which could reduce the risk of nocturnal and morning hypoglycemia and possibly hold other advantages regarding regulation.
- Patients with poorly regulated T1DM, an average glycated hemoglobin (HbA1c) level  $\geq 7\%$ , frequent nocturnal and/or morning hypoglycemic episodes and high pre-dinner blood glucose values ( $\geq 7.1$  mmol/l) were included in the study.
- HbA1c levels were significantly decreased 12 weeks following transition, as well as frequency of nocturnal and morning hypoglycemic episodes. Basal insulin doses and body weight were not affected. Triglycerides were decreased and high-density lipoprotein was improved.
- Transition from bedtime to morning basal insulin administration could improve glucoregulation, glucose variability and lipid profile as well as reduce the number of hypoglycemic episodes without affecting body weight.

This summary slide represents the opinions of the authors. For a full list of acknowledgments and disclosures for all authors of this article, please see the full text online. © The Author(s) 2015. Creative Commons Attribution Noncommercial License (CC BY-NC).
